# Supplementary material for: Rediscovery of Osteocephalus vilarsi (Anura: Hylidae): an overlooked but widespread Amazonian spiny-backed treefrog
Source: PeerJ. 2019 Dec 4;7:e8160. doi: 10.7717/peerj.8160 (PMC6898988; doi:10.7717/peerj.8160)
Supplement: Supplemental Information 1 — Symbols: * = specimens previously published as Osteocephalus planiceps. References are available in the main text. [file peerj-07-8160-s001.xlsx]

## Sheet: Planilha1
Supplemental table 1. Sampling localities of Osteocephalus vilarsi in the Amazonas state, Brazil. Symbols: * = specimens previously published as Osteocephalus planiceps. References are available in the main text.
Locality	Municipality	Lat	Long	Collectors	Year	Reference
Rio Negro Sustainable Development Reserve	Novo Airão	03°04’32”S	60°45’22”W	A. Lima, J. Moravec, M. Ferrão, A. Ferreira, and D. Ortiz	2015–2018	This study
Seringalzinho Village, Jaú National Park	Novo Airão	01°52’7.1”S	61°35’0.1”W	M. Gordo	2000	This study
5 km south Seringalzinho Village, Jaú National Park	Novo Airão	01°54’4”S	61°35’2”W	S. Neckel-Oliveira and M. Gordo	2000	Gordo & Neckel-Oliveira, 2004*
Miratucu Lake, Jaú National Park	Novo Airão	01°56’5”S	61°49’1”W	M. Gordo	1995	This study
Pico da Neblina National Park	São Gabriel da Cachoeira	00°39’45”N	66°09’26”W	L. Moraes, A. Silva, and I. Junqueira	2016	This study
Missão Taracuá	São Gabriel da Cachoeira	00°07’56”N	68°33’03”W	V.T. Carvalho and R.R. Rojas	2013	This study
East bank of Ayuanã River	Santa Isabel do Rio Negro	00°35’1”S	64°53’3”W	M. Gordo and V. T. Carvalho	2012	Menin et al., 2017*
Northern bank of Japurá River	Japurá	01°43’42.6”S	69° 7’54.7”W	M. Gordo and V. T. Carvalho	2014	This study
