# Supplementary material for: Rediscovery of Osteocephalus vilarsi (Anura: Hylidae): an overlooked but widespread Amazonian spiny-backed treefrog
Source: PeerJ. 2019 Dec 4;7:e8160. doi: 10.7717/peerj.8160 (PMC6898988; doi:10.7717/peerj.8160)
Supplement: Supplemental Information 2 — See text for abbreviations. [file peerj-07-8160-s002.xlsx]

## Sheet: Planilha1
Supplemental Table 2. Samples of the Osteocephalus and Dryaderces genera used for the phylogenetic analyses. See text for abbreviations.
Species	Locality		GenBank Accession					References
		Voucher	12S	16S	CYTB	ND1	COI
D. pearsoni	Bolivia: Beni: Rurrenabaque	SMNS 14187	KF002006	KF002006	KF001947	KF002188	-	Jungfer et al. 2013
D. pearsoni	Bolivia: Beni: Rurrenabaque	SMNS 14188	KF002007	KF002007	KF001948	-	-	Jungfer et al. 2013
D. CA1	Brazil: Amazonas: Areal, Rio Abacaxi	MTR 13173	KF002010	KF002010	-	KF002189	KF001882	Jungfer et al. 2013
D. CA1	Brazil: Mato Grosso: Aripuanã	MZUSP 87697	KF002013	KF002013	KF001949	-	-	Jungfer et al. 2013
O. alboguttatus	Ecuador: Napo: Jatun Sacha	SMNS 14189	KF002018	KF002018	KF001954	KF002192	-	Jungfer et al. 2013
O. alboguttatus	Ecuador: Pastaza: Canelos	QCAZ 15981	HQ600629	-	-	HQ600596	-	Ron et al. 2010
O. alboguttatus	Ecuador: Pastaza: Canelos	QCAZ 18186	JQ868516	JQ868516	-	-	-	Salerno et al. 2012
O. buckleyi	Peru: Loreto: 28 km S of Iquitos	KHJ-F 067	KF002023	KF002023	KF001958	-	-	Jungfer et al. 2013
O. buckleyi	Ecuador: Orellana: Yasuní	SMNS 13713	KF002022	KF002022	KF001957	KF002196	-	Jungfer et al. 2013
O. buckleyi	Peru: Loreto: Tambo	MHNC 7687	KF002039	KF002039	-	-	-	Jungfer et al. 2013
O. buckleyi	Ecuador: Napo: Jatun Sacha	SMNS 13715	KF002021	KF002021	KF001956	KF002195	-	Jungfer et al. 2013
O. buckleyi	Ecuador: Napo: Jatun Sacha	SMNS 13714	KF002020	KF002020	KF001955	KF002194	-	Jungfer et al. 2013
O. cabrerai	Colombia: Amazonas: Leticia	UA-A 931	KF002028	KF002029	-	-	KF001888	Jungfer et al. 2013
O. cabrerai	Peru: Loreto: Río Iauasiyacu	KHJ-F 082	KF002030	KF002030	-	KF002199		Jungfer et al. 2013
O. cabrerai	Ecuador: Sucumbíos: Puerto Bolívar	QCAZ 27923	JX847086	JX875617	-	JX875617	JX875827	Ron et al. 2012
O. camufatus	Brazil: Amazonas: Areal, Rio Abacaxi	MTR 13147	KF002026	KF002026	-	KF002197	KF001886	Jungfer et al. 2013
O. camufatus	Brazil: Amazonas: IgarapéAçu, Rio Abacaxis	MTR 12779	KF002027	KF002027	-	KF002198	KF001887	Jungfer et al. 2013
O. cannatellai	Colombia: Caquetá: San José del Fragua: Finca Buena Esperanza	TG 1852	KF002031	KF002031	-	-	-	Jungfer et al. 2013
O. cannatellai	Colombia: Caquetá: San José del Fragua: Finca Buena Esperanza	TG 1853	KF002032	KF002032	-	-	-	Jungfer et al. 2013
O. cannatellai	Ecuador: Pastaza, Río Pucayacu near Zanjarajuno Reserve	QCAZ 49572	JX847107	JX875641	-	JX875641	JX875866	Ron et al. 2012
O. cannatellai	Ecuador: Pastaza, Río Pucayacu near Zanjarajuno Reserve	QCAZ 45909	JX847101	JX875635	-	JX875635	JX875860	Ron et al. 2012
O. carri	Colombia: Boyacá: Pajarito	MAR 1379	KF002033	KF002033	-	-	-	Jungfer et al. 2013
O. castaneicola	Bolivia: Pando: San Antonio	CBF 6051	FJ965300	FJ965300	-	-	-	Moravec et al. 2009
O. castaneicola	Bolivia: Pando: San Antonio	NMP-P6V 6V73810/3	FJ965301	FJ965301	-	-	-	Moravec et al. 2009
O. castaneicola	Bolivia: Pando: San Antonio	NMP-P6V 6V73820	FJ965303	FJ965303	-	-	-	Moravec et al. 2009
O. castaneicola	Peru: Cusco: Miaria	MUSM 23918	KF002034	KF002034	-	KF002200	KF001889	Jungfer et al. 2013
O. castaneicola	Peru: Madre de Dios: Gamitana	MHNC 8131	KF002035	KF002035	-	-	-	Jungfer et al. 2013
O. deridens	Ecuador: Orellana: Yasuní	SMNS 14193	KF002036	KF002036	KF001959	KF002201	-	Jungfer et al. 2013
O. deridens	Peru: Loreto: 28 km S of Iquitos	KHJ-F 006	KF002037	KF002037	-	KF002202	KF001890	Jungfer et al. 2013
O. deridens	Ecuador: Orellana: Yasuní	QCAZ 20868	JQ868501	JQ868501	-	-	-	Salerno et al. 2012
O. festae	Ecuador: Loja: San Francisco	QCAZ 39364	HQ600648	HQ600615	-	HQ600615	JX875851	Ron et al. 2010; Ron et al. 2012
O. festae	Ecuador: Morona-Santiago: Río Napinaza	QCAZ 38420	HQ600646	JQ868526	-	HQ600613	JX875847	Ron et al. 2010; Ron et al. 2012
O. festae	Peru: Amazonas: Camñopite	CORBIDI 1965	JX847064	-	-	-	JX875803	Ron et al. 2012
O. fuscifacies	Ecuador: Napo: Jatun Sacha	SMNS 14194	KF002038	KF002038	KF001960	KF002203	-	Jungfer et al. 2013
O. fuscifacies	Peru: Loreto: Andoas	MHNC 767 8	KF002024	KF002025	-	-	-	Jungfer et al. 2013
O. fuscifacies	Ecuador: Orellana: Estación Científica Yasuní	QCAZ 20785	HQ600631	-	-	HQ600598	JX875818	Ron et al. 2010; Ron et al. 2012
O. helenae	Brazil: Acre: Catuaba	SMNS 14191	KF002042	KF002042	KF001962	KF002204	-	Jungfer et al. 2013
O. helenae	Brazil: Acre: Catuaba	SMNS 14190	KF002041	KF002041	KF001961	-	-	Jungfer et al. 2013
O. helenae	Brazil: Amapá: Igarapé Camaipí, Alto Rio Maracá	MTR 6224	KF002043	KF002043	KF001963	-	-	Jungfer et al. 2013
O. helenae	Brazil: Amazonas: Campo Tupana	SMS 101	KF002045	KF002045	-	-	KF001891	Jungfer et al. 2013
O. helenae	Guyana: Potaro-Siparuni: Kaieteur NP	IRSNB 14669	KF002048	KF002048	-	KF002205	-	Jungfer et al. 2013
O. helenae	Venezuela: Delta Amacuro: Reserva Forestal Río Grande	MHNLS 20151	KF002053	KF002053	-	-	-	Jungfer et al. 2013
O. heyeri	Colombia: Amazonas: Leticia	AJC 2581	KF002054	KF002054	-	-	-	Jungfer et al. 2013
O. heyeri	Colombia: Amazonas: Leticia	UA-A 948	KF002055	KF002055	-	-	-	Jungfer et al. 2013
O. leoniae	Peru: Amazonas: Santa María de Nieva	Trie r129_2736	KF002056	KF002056	-	KF002206	KF001893	Jungfer et al. 2013
O. leoniae	Peru: San Martín: 14 km NE of Tarapoto	KHJ-F 112	KF002058	KF002058	KF001965	-	-	Jungfer et al. 2013
O. leprieuri SS	French Guiana: Cayenne: Arataï	SMNS 9278	KF002060	KF002060	KF001966	KF002207	-	Jungfer et al. 2013
O. leprieuri SS	Guyana: Potaro-Siparuni: Mabura Hill Forest Reserve	SMNS 12056	KF002063	KF002063	KF001967	KF002208	-	Jungfer et al. 2013
O. leprieuri SS	Guyana: Potaro-Siparuni: Wayalayeng Village	IRSNB 14656	KF002064	KF002064	-	-	KF001895	Jungfer et al. 2013
O. leprieuri CA1	Brazil: Amazonas: Palhalzinho, Rio Abacaxis	MTR 13333	KF002068	KF002068	-	KF002211	KF001899	Jungfer et al. 2013
O. leprieuri CA1	Brazil: Amazonas: Ponta do Apinari, Rio Abacaxis	MTR 12664	KF002069	KF002069	-	KF002212	KF001900	Jungfer et al. 2013
O. leprieuri CA2	Bolivia: Santa Cruz: PN Noel Kempff Mercado	KHJhy l24	KF002070	KF002070	KF001968	KF002213	-	Jungfer et al. 2013
O. leprieuri CA2	Brazil: Amazonas: Cachoeira das Pombas, Rio Aripuanã	MTR 10220	KF002071	KF002071	-	KF002214	-	Jungfer et al. 2013
O. leprieuri CA2	Bolivia: Pando: Palmira	NMP-P6V 6d41/2009	FJ965297	FJ965297	-	-	-	Moravec et al. 2009
O. leprieuri CA2	Bolivia: Pando: Nacebe	NMP-P6V 6V72173/1	FJ965299	FJ965299	-	-	-	Moravec et al. 2009
O. mimeticus	Peru: Huánuco: Fundo Flor, Río Pachitea	SMNS 14150	KF002077	KF002077	KF001969	KF002215	-	Jungfer et al. 2013
O. mimeticus	Peru: Cusco: ZR Nahua Kugapakori	MUSM 23180	KF002075	KF002076	-	-	KF001901	Jungfer et al. 2013
O. mimeticus	Peru: Huánuco: Boquerón del Padre Abad	KHJ-F 106	KF002078	KF002078	KF001970	KF002216	-	Jungfer et al. 2013
O. mutabor	Ecuador: Napo: Carretera Jondachi-Coca km 44	EPN-H 6659	KF002080	KF002080	KF001972	-	-	Jungfer et al. 2013
O. mutabor	Ecuador: Napo: Huino	QCAZ 30925	-	-	-	JX875620	JX875837	Ron et al. 2012
O. mutabor	Ecuador: Napo: Huino	QCAZ 30926	HQ600643	-	-	HQ600610	JX875838	Ron et al. 2010; Ron et al. 2012
O. oophagus	Brazil: Amazonas: Manaus, Ducke	INPA-H 37095	-	MH357684	-	-	-	Ortiz et al. 2018
O. oophagus	Brazil: Amazonas: Manaus, Ducke	SMNS 10802	KF002082	KF002082	KF001974	KF002249	-	Jungfer et al. 2013
O. oophagus	Brazil: Amazonas: E. E. Anavilhanas	MSH 10225	KF002081	KF002081	KF001973	-	-	Jungfer et al. 2013
O. planiceps	Peru: Loreto: Confluence of Ríos Blanco and Negro (= Rio Peneya)	MHNC 6369	KF002089	KF002090	-	-	-	Jungfer et al. 2013
O. planiceps	Colombia: Amazonas: Leticia	SMNS 14196/2	KF002087	KF002087	-	KF002222	KF001903	Jungfer et al. 2013
O. planiceps	Colombia: Amazonas: Leticia	SMNS 14196	KF002086	KF002086	-	KF002221	-	Jungfer et al. 2013
O. planiceps	Peru: Ucayali: Imiría	GGU 752	KF002091	KF002091	-	-	KF001904	Jungfer et al. 2013
O. planiceps	Peru: Ucayali: Conservation Area Imiría	NMP-P6V 74913	KY211976	KY211978	-	-	-	Moravec et al. 2016
O. planiceps	Ecuador: Orellana: Estación Científica Yasuní	QCAZ 20797	HQ600632	-	-	HQ600599	JX875819	Ron et al. 2010
O. planiceps CA1	Venezuela: Amazonas: Neblina Base Camp Rio Mawarinuma (= Rio Baria)	AMNH A-131254	AY549361	AY549361	AY843952	KF002223	KF001905	Faivovich et al. 2004; Jungfer et al. 2013
O. subtilis	Brazil: Acre: Cruzeiro do Sul: Mata do BIS	TG 2977	KF002092	KF002092	-	-	-	Jungfer et al. 2013
O. subtilis	Brazil: Acre: Cruzeiro do Sul: Mata do BIS	TG 2978	KF002093	KF002093	-	-	-	Jungfer et al. 2013
O. subtilis	Peru: Loreto/Requena: Río Buncuya	GGU 901	KF002094	KF002094	-	-	KF001906	Jungfer et al. 2013
O. taurinus	Brazil: Amazonas: Manaus, Ducke	APL 17872	KF002111	KF002112	-	-	-	Jungfer et al. 2013
O. taurinus	Brazil: Amazonas: Manaus, Ducke	INPA-H 37102	-	MH357687	-	-	-	Ortiz et al. 2018
O. taurinus	Brazil: Amazonas: E. E. Anavilhanas	MSH 10223	KF002109	KF002109	KF001978	-	-	Jungfer et al. 2013
O. taurinus	Brazil: Amazonas: BR-319, km 100, M2	INPA-H 37084	-	MH357691	-	-	-	Ortiz et al. 2018
O. taurinus *	Brazil: Amazonas: BR-319, km 100, M2	APL 21774	-	MK572703	-	-	-	This study
O. taurinus	Brazil: Amazonas: Missão Taracuá	MG/Taracua 27	-	MK572704	-	-	-	This study
O. verruciger	Ecuador: Sucumbíos: Río Azuela	SMNS 14197	KF002170	KF002170	KF001995	KF002241	-	Jungfer et al. 2013
O. verruciger	Ecuador: Napo: km 13 Loreto-Coca road	QCAZ 22201	JX847084	JX875614	-	JX875614	JX875820	Ron et al. 2012
O. verruciger	Colombia: Caquetá: Municipio de Florencia: Vereda Sucre	1953-03-01	KF002168	KF002168	-	-	-	Jungfer et al. 2013
O. vilarsi	Brazil: Amazonas: Novo Airão, RDS Rio Negro	INPA-H 40468	-	MK572696	-	-	-	This study
O. vilarsi	Brazil: Amazonas: Novo Airão, RDS Rio Negro	INPA-H 40452	-	MK572697	-	-	-	This study
O. vilarsi	Brazil: Amazonas: Novo Airão, RDS Rio Negro	INPA-H 40460	-	MK572698	-	-	-	This study
O. vilarsi	Brazil: Amazonas: Novo Airão, RDS Rio Negro	INPA-H 40454	-	MK572699	-	-	-	This study
O. vilarsi	Brazil: Amazonas: São Gabriel da Cachoeira, Pico da Neblina	INPA-H 37243	-	MK572692	-	-	-	This study
O. vilarsi	Brazil: Amazonas: São Gabriel da Cachoeira, Pico da Neblina	INPA-H 37244	-	MK572693	-	-	-	This study
O. vilarsi	Brazil: Amazonas: São Gabriel da Cachoeira, Pico da Neblina	INPA-H 37245	-	MK572695	-	-	-	This study
O. vilarsi	Brazil: Amazonas: São Gabriel da Cachoeira, Pico da Neblina	INPA-H 37246	-	MK572694	-	-	-	This study
O. vilarsi	Brazil: Amazonas: Missão Taracuá	INPA-H 40458	-	MK572700	-	-	-	This study
O. vilarsi	Brazil: Amazonas: Missão Taracuá	INPA-H 40470	-	MK572701	-	-	-	This study
O. vilarsi	Brazil: Amazonas: Missão Taracuá	INPA-H 40461	-	MK572702	-	-	-	This study
O. yasuni	Ecuador: Orellana: Yasuní	SMNS 14198	KF002172	KF002172	KF001997	KF002242	-	Jungfer et al. 2013
O. yasuni	Ecuador: Sucumbíos: Playas de Cuyabeno	QCAZ 27816	HQ600636	-	-	HQ600603	JX875826	Ron et al. 2010; Ron et al. 2012
O. yasuni	Brazil: Acre: Tarauacá	CFBH 15715	KF002171	KF002171	KF001996	-	KF001936	Jungfer et al. 2013
O. yasuni	Peru: Loreto: Río Iauasiyacu	KHJ-F 113	KF002175	KF002175	-	KF002243	KF001937	Jungfer et al. 2013
